# Supplementary material for: Amino functionalized Zn/Cd-metal–organic frameworks for selective CO2 adsorption and Knoevenagel condensation reactions
Source: Royal Society of Chemistry journal article supplement (doi:10.1039/c9dt00391f), 2019-01-01
Supplement: c9dt00391f1.pdf [file c9dt00391f1.pdf]

*Supporting Information for the manuscript:*

# Amino Functionalized Zn/Cd- Metal–Organic Frameworks for Selective CO<sub>2</sub> Adsorption and Knoevenagel Condensation Reaction

*Zhi-Wei Zhai,<sup>a,b</sup> Shuang-Hua Yang,<sup>b</sup> Ya-Ru Lv,<sup>a</sup> Chen-Xia Du,<sup>a</sup> Lin-Ke Li,<sup>\*a</sup> Shuang-Quan  
Zang<sup>\*a</sup>*

<sup>†</sup>College of Chemistry and Molecular Engineering, Zhengzhou University, Zhengzhou,  
450001, P. R. China

<sup>‡</sup>School of Environmental Engineering and Chemistry, Luoyang Institute of Science and  
Technology, Luoyang 471023, P. R. China

This file includes Table S1–S4 and Figures S1–S14.

## Contents

**Figure S1.** The IR spectra of **1**.

**Figure S2.** The IR spectra of **2**.

**Table S1.** Crystallographic data for **1** and **2**.

**Table S2.** Selected bond distances (Å) and angles (°) for **1** and **2**.

**Figure S3.** The rhombus-shaped grids in 2D sheet layers for **1** and **2**.

**Figure S4.** PXRD patterns of **1**.

**Figure S5.** PXRD patterns of **2**.

**Figure S6.** Thermogravimetric analyses plots of synthesized **1** and activated **1**.

**Figure S7.** Thermogravimetric analyses plots of synthesized **2** and activated **2**.

**Figure S8.** (a) N<sub>2</sub> adsorption isotherms at 77 K for **1**. (b). N<sub>2</sub> adsorption isotherms at 77 K for **2**.

**Figure S9.** Isosteric heat of adsorption versus CO<sub>2</sub> loading for **2**.

**Figure S10.** CO<sub>2</sub> adsorption isotherms at 195 K and 273 K for **1**.

**Figure S11.** Reaction conversion versus reaction time for Knoevenagel condensation reaction of benzaldehyde and malononitrile with **1a** and **2a** as catalyst.

**Table S3.** Knoevenagel condensation reactions of benzaldehyde catalyzed by different catalysts.

**Table S4.** Recyclable experiments of **1a** and **2a** as catalyst for Knoevenagel reaction.

**Figure S12.** (a) IR spectra of **1a** before and after five round catalytic experiments. (b) IR spectra of **2a** before and after five round catalytic experiments.

**Figure S13.** (a) PXRD patterns of **1a** before and after five round catalytic experiments. (b) PXRD patterns of **2a** before and after five round catalytic experiments.

**Figure S14.** (a) SEM images of **1a** before catalytic experiment. (b) SEM images of **1a** after five round catalytic experiments. (c) SEM images of **2a** before catalytic experiment. (d) SEM images of **2a** after five round catalytic experiments.

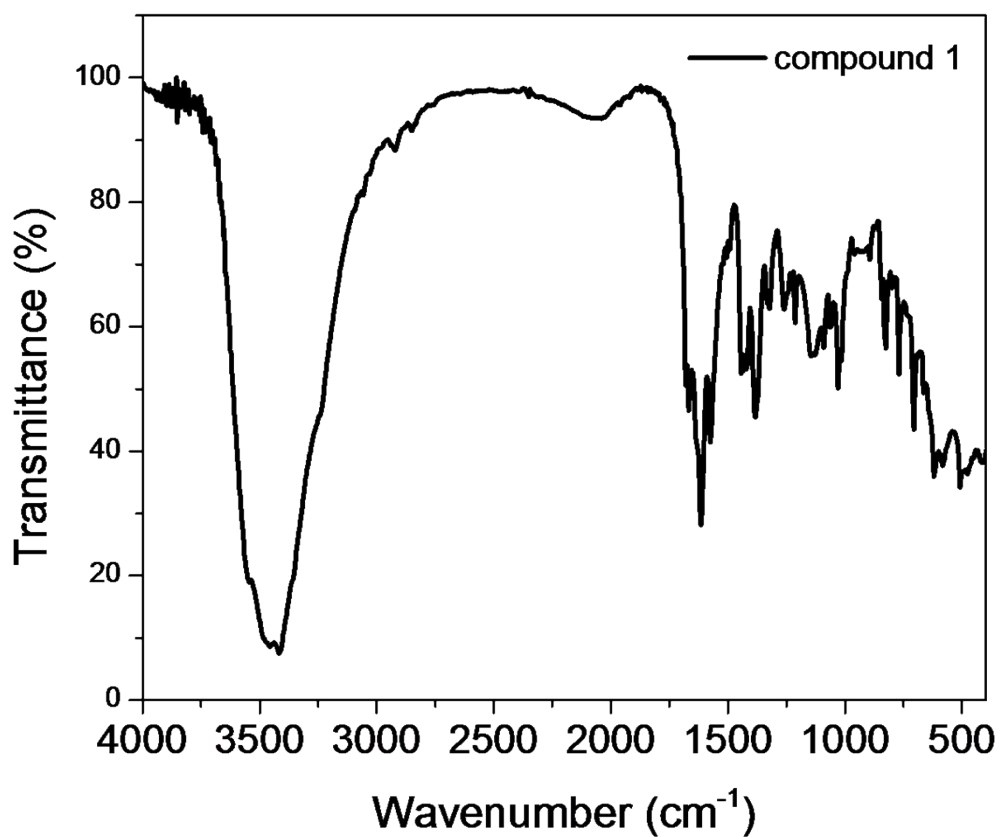

Figure S1. The IR spectra of 1.

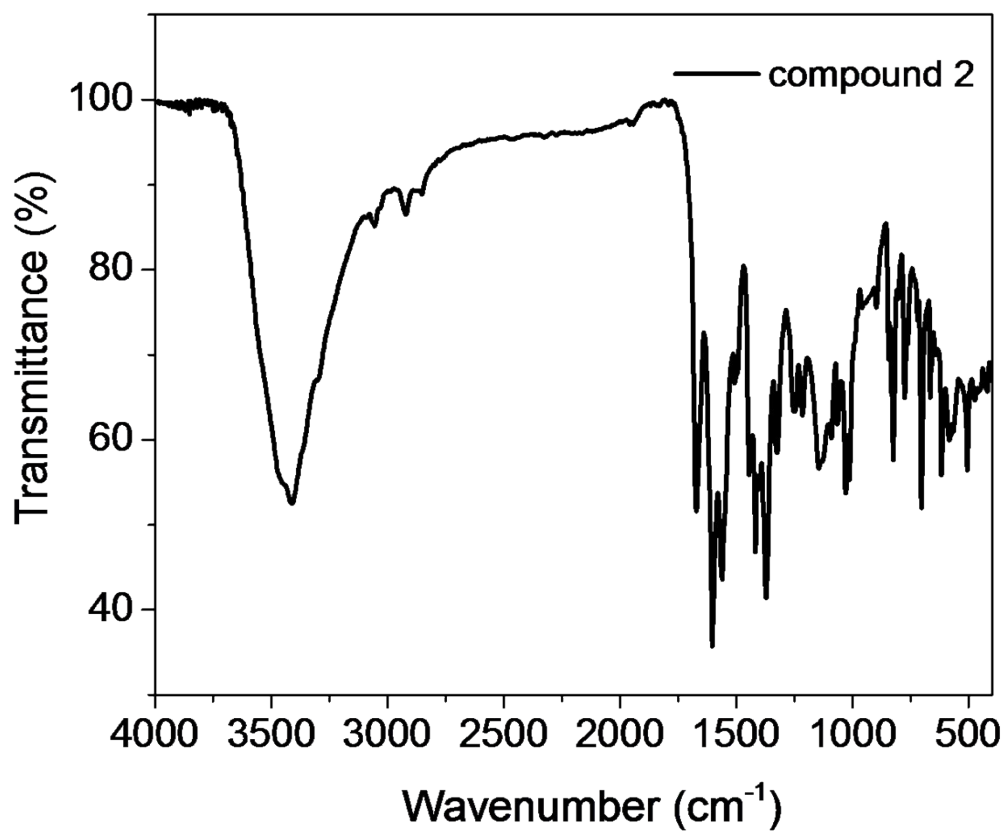

Figure S2. The IR spectra of 2.

**Table S1** Crystallographic data for **1** and **2**

| Compounds                                                                                             | <b>1</b>                                                                       | <b>2</b>                                                                         |
|-------------------------------------------------------------------------------------------------------|--------------------------------------------------------------------------------|----------------------------------------------------------------------------------|
| Formula                                                                                               | ZnC <sub>25</sub> H <sub>20</sub> N <sub>6</sub> O <sub>5</sub> S <sub>2</sub> | CdC <sub>25</sub> H <sub>21</sub> N <sub>6</sub> O <sub>5.5</sub> S <sub>2</sub> |
| Formula weight                                                                                        | 613.96                                                                         | 670.01                                                                           |
| Temperature (K)                                                                                       | 150                                                                            | 150                                                                              |
| Crystal system                                                                                        | orthorhombic                                                                   | monoclinic                                                                       |
| Space group                                                                                           | <i>Pccn</i>                                                                    | <i>P2<sub>1</sub>/n</i>                                                          |
| <i>a</i> (Å)                                                                                          | 18.5564(2)                                                                     | 13.56520(10)                                                                     |
| <i>b</i> (Å)                                                                                          | 17.2237(2)                                                                     | 14.40230(10)                                                                     |
| <i>c</i> (Å)                                                                                          | 16.5743(2)                                                                     | 13.93520(10)                                                                     |
| $\alpha$ (°)                                                                                          | 90                                                                             | 90                                                                               |
| $\beta$ (°)                                                                                           | 90                                                                             | 100.8040(10)                                                                     |
| $\gamma$ (°)                                                                                          | 90                                                                             | 90                                                                               |
| <i>V</i> (Å <sup>3</sup> )                                                                            | 5297.31(11)                                                                    | 2674.26(3)                                                                       |
| <i>Z</i>                                                                                              | 8                                                                              | 4                                                                                |
| <i>D</i> <sub>calc</sub> (g cm <sup>-3</sup> )                                                        | 1.540                                                                          | 1.664                                                                            |
| <i>F</i> (000)                                                                                        | 2512.0                                                                         | 1168.0                                                                           |
| Reflections Collected                                                                                 | 18616                                                                          | 14867                                                                            |
| Independent Reflections                                                                               | 5234                                                                           | 5251                                                                             |
| observed data [ <i>I</i> > 2σ( <i>I</i> )]                                                            | 4601                                                                           | 4722                                                                             |
| <i>R</i> <sub>int</sub>                                                                               | 0.0311                                                                         | 0.0375                                                                           |
| GOF on <i>F</i> <sup>2</sup>                                                                          | 1.043                                                                          | 1.097                                                                            |
| <i>R</i> <sub>1</sub> <sup>a</sup> , <i>wR</i> <sub>2</sub> <sup>b</sup> [ <i>I</i> > 2σ( <i>I</i> )] | 0.0332, 0.0842                                                                 | 0.0397, 0.1120                                                                   |
| <i>R</i> <sub>1</sub> , <i>wR</i> <sub>2</sub> (all data)                                             | 0.0387, 0.0870                                                                 | 0.0428, 0.1140                                                                   |

$${}^a R_1 = \frac{\sum \|F_o\| - |F_c|}{\sum |F_o|}, {}^b wR_2 = [\sum w(F_o^2 - F_c^2)^2 / \sum w(F_o^2)^2]^{1/2}$$

**Table S2.** Selected bond lengths (Å) and angles (°) for **1** and **2**.

| <b>1</b>            |            |                     |            |
|---------------------|------------|---------------------|------------|
| Zn(1)–O(1)          | 2.0003(14) | Zn(1)–O(2)#2        | 2.0352(14) |
| Zn(1)–O(3)#1        | 2.0907(15) | Zn(1)–O(4)#1        | 2.3179(16) |
| Zn(1)–N(1)          | 2.1512(17) | Zn(1)–N(2)#3        | 2.1893(18) |
| O(2)–Zn(1)#2        | 2.0351(14) | O(3)–Zn(1)#4        | 2.0906(15) |
| O(4)–Zn(1)#4        | 2.3179(16) | N(2)–Zn(1)#6        | 2.1893(18) |
| O(1)–Zn(1)–O(2)#1   | 120.73(6)  | O(1)–Zn(1)–O(3)#2   | 151.72(6)  |
| O(1)–Zn(1)–O(4)#2   | 92.31(6)   | O(1)–Zn(1)–N(1)     | 88.37(6)   |
| O(1)–Zn(1)–N(2)#3   | 91.35(6)   | O(2)#1–Zn(1)–O(3)#2 | 87.55(6)   |
| O(2)#1–Zn(1)–O(4)#2 | 146.63(6)  | O(2)#1–Zn(1)–N(1)   | 87.88(6)   |
| O(2)#1–Zn(1)–N(2)#3 | 92.37(6)   | O(3)#2–Zn(1)–O(4)#2 | 59.46(6)   |
| O(3)#2–Zn(1)–N(1)   | 92.32(6)   | O(3)#2–Zn(1)–N(2)#3 | 87.87(6)   |
| N(1)–Zn(1)–O(4)#2   | 88.53(6)   | N(1)–Zn(1)–N(2)#3   | 179.70(7)  |
| N(2)#3–Zn(1)–O(4)#2 | 91.36(6)   |                     |            |
| <b>2</b>            |            |                     |            |
| Cd(1)–O(1)          | 2.242(2)   | Cd(1)–O(2)#2        | 2.291(2)   |
| Cd(1)–O(3)#1        | 2.339(2)   | Cd(1)–O(4)#1        | 2.409(2)   |
| Cd(1)–N(1)          | 2.321(3)   | Cd(1)–N(2)#3        | 2.340(3)   |
| O(2)–Cd(1)#2        | 2.291(2)   | O(3)–Cd(1)#4        | 2.339(2)   |
| O(4)–Cd(1)#4        | 2.409(2)   | N(2)–Cd(1)#5        | 2.339(3)   |
| O(1)–Cd(1)–O(2)#2   | 123.34(8)  | O(1)–Cd(1)–O(3)#1   | 149.18(8)  |
| O(1)–Cd(1)–O(4)#1   | 96.73(8)   | O(1)–Cd(1)–N(1)     | 97.86(9)   |
| O(1)–Cd(1)–N(2)#3   | 85.62(9)   | O(2)#2–Cd(1)–O(3)#1 | 85.87(8)   |
| O(2)#2–Cd(1)–O(4)#1 | 139.92(8)  | O(2)#2–Cd(1)–N(1)   | 86.03(9)   |
| O(2)#2–Cd(1)–N(2)#3 | 84.31(9)   | O(3)#1–Cd(1)–O(4)#1 | 54.93(8)   |
| O(3)#1–Cd(1)–N(2)#3 | 88.15(11)  | N(1)–Cd(1)–O(3)#1   | 93.40(11)  |
| N(1)–Cd(1)–O(4)#1   | 88.13(10)  | N(1)–Cd(1)–N(2)#3   | 170.09(11) |
| N(2)#3–Cd(1)–O(4)#1 | 100.73(10) |                     |            |

Symmetry code for **1**: #1.  $1/2 + x, -y, 1/2 - z$ ; #2.  $1 - x, -y, 1 - z$ ; #3.  $+x, -1 + y, +z$ ; #4.  $-1/2 + x, -y, 1/2 - z$ ; #5.  $3/2 - x, 1/2 - y, +z$ ; #6.  $+x, 1 + y, +z$ ; #7.  $1/2 - x, 1/2 - y, +z$ . Symmetry code for **2**: #2.  $2 - x, 1 - y, 2 - z$ ; #1.  $1/2 + x, 3/2 - y, -1/2 + z$ ; #3.  $1 + x, +y, 1 + z$ ; #4.  $-1/2 + x, 3/2 - y, 1/2 + z$ ; #5.  $-1 + x, +y, -1 + z$ .

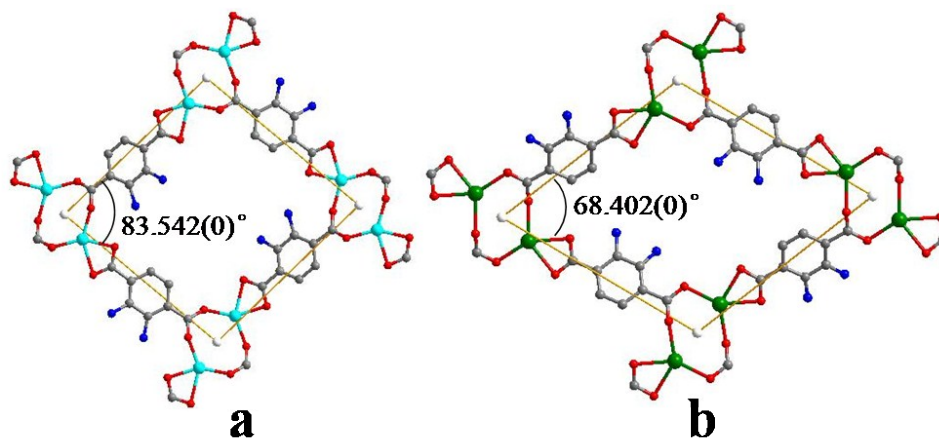

**Figure S3.** The rhombus-shaped grids in 2D sheet layers for **1** and **2**.

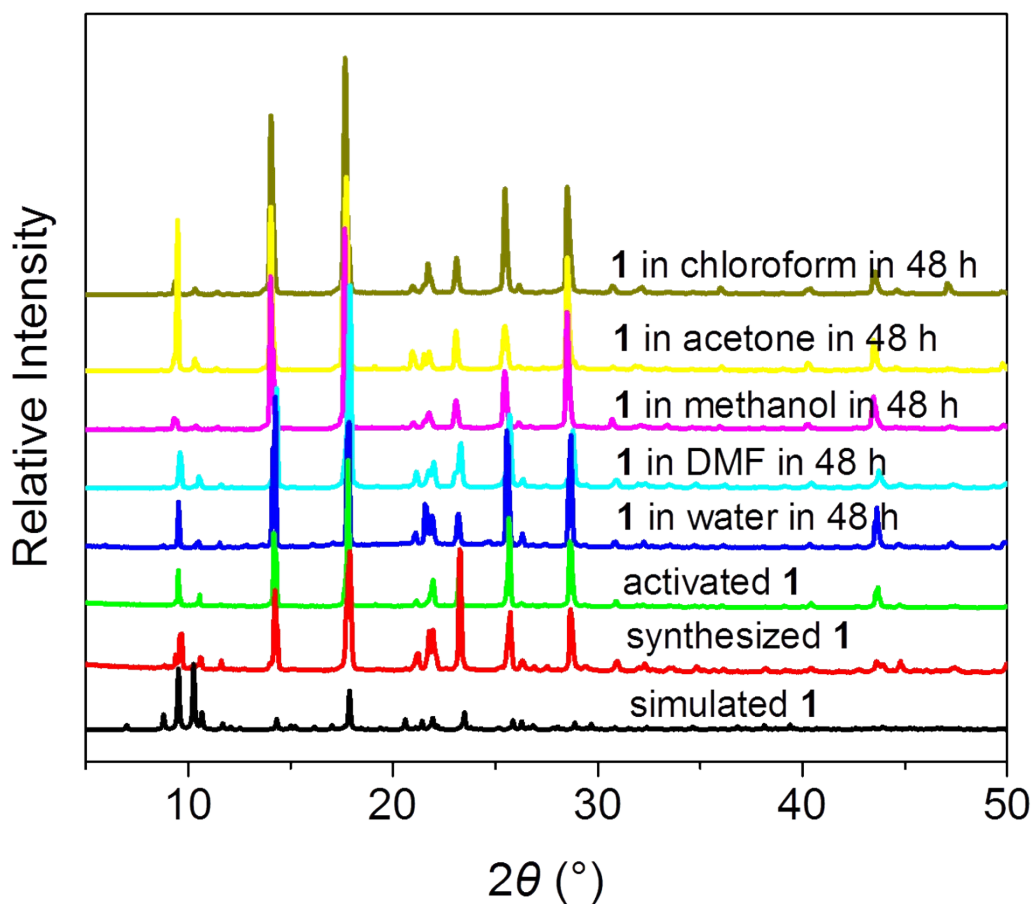

**Figure S4.** PXRD patterns of **1**.

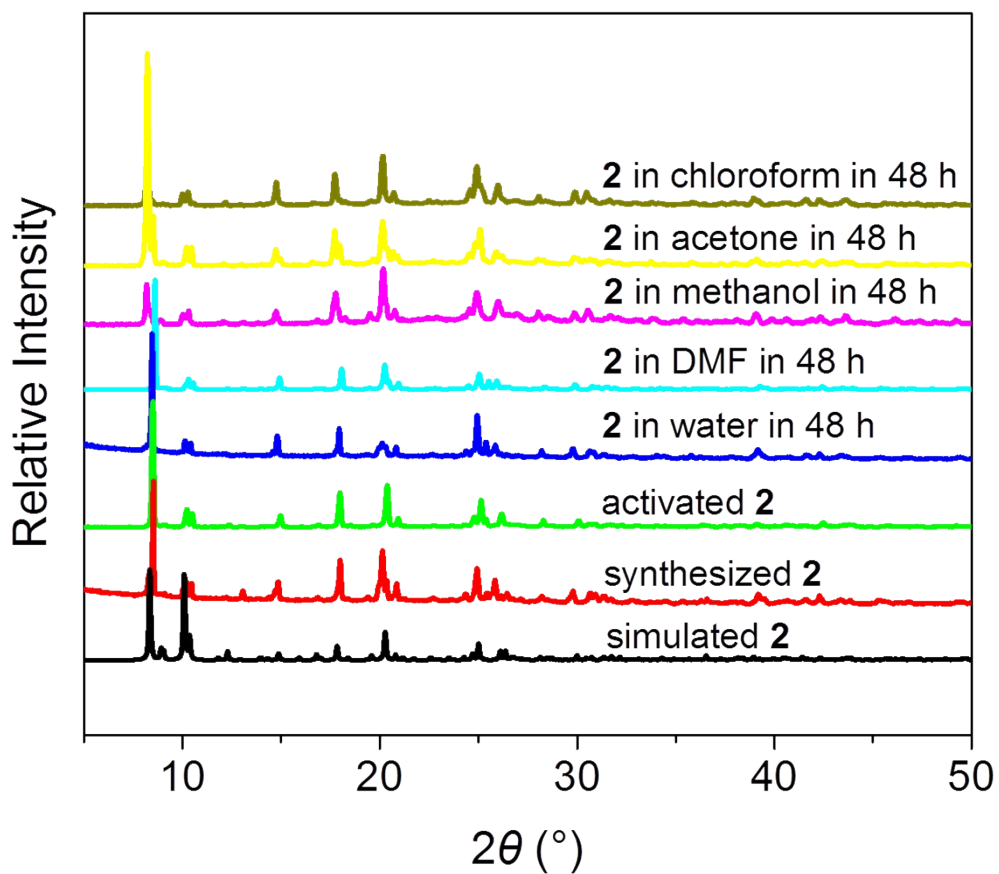

Figure S5. PXRD patterns of 2.

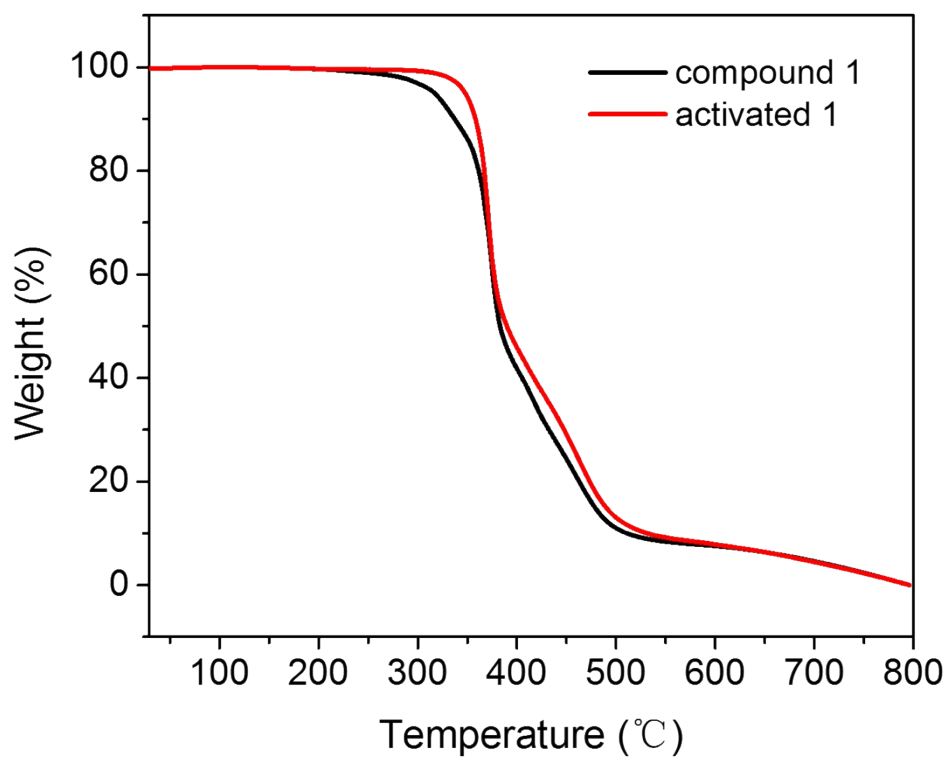

Figure S6. Thermogravimetric analyses plots of synthesized 1 and activated 1.

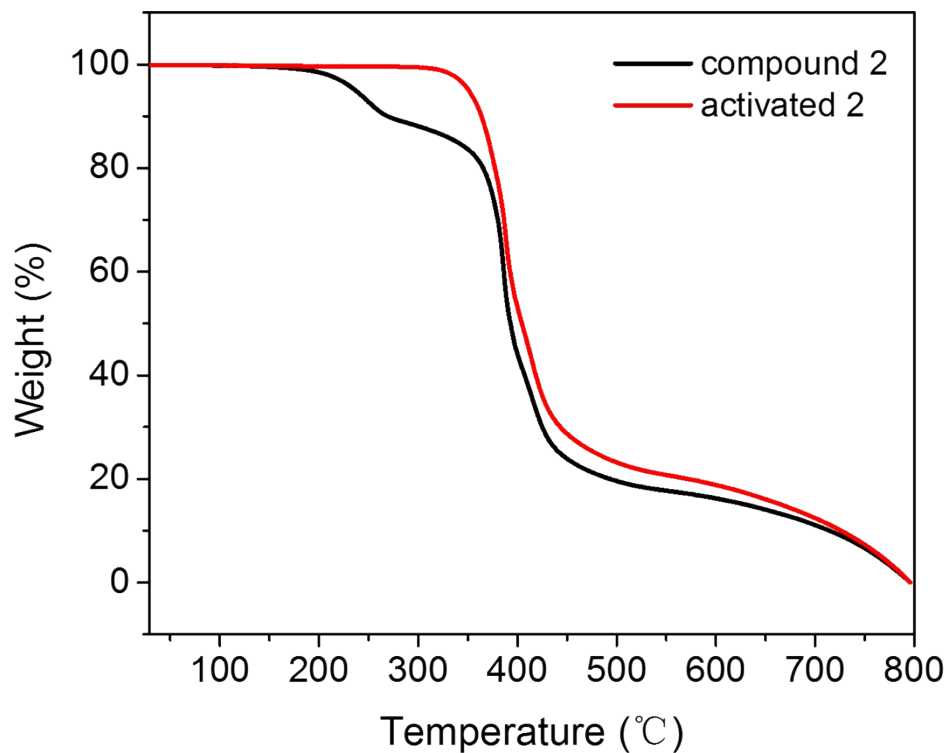

**Figure S7.** Thermogravimetric analyses plots of synthesized **2** and activated **2**.

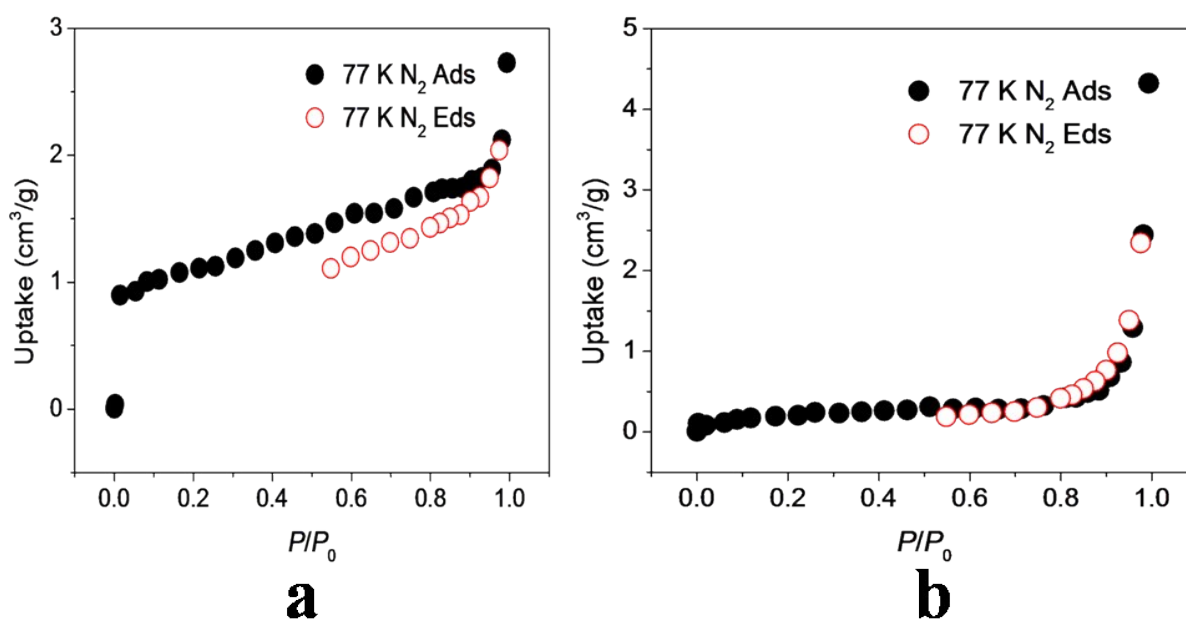

**Figure S8.** (a)  $N_2$  adsorption isotherms at 77 K for **1**. (b)  $N_2$  adsorption isotherms at 77 K for **2**. Filled and open symbols represent adsorption and desorption, respectively.



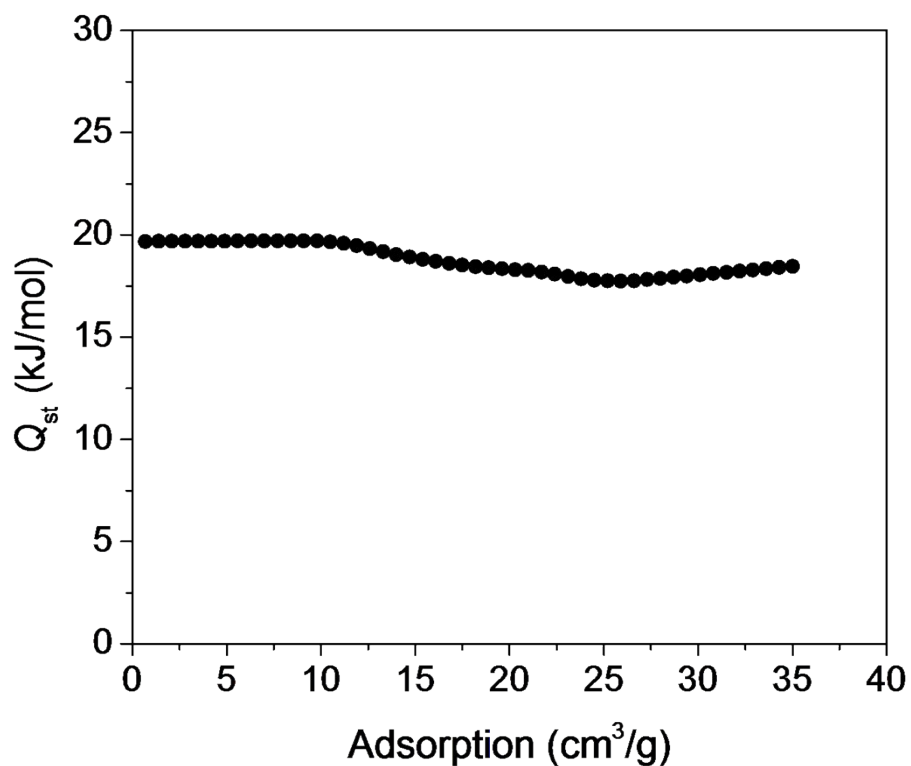

Figure S9. Isosteric heat of adsorption versus CO<sub>2</sub> loading for 2.

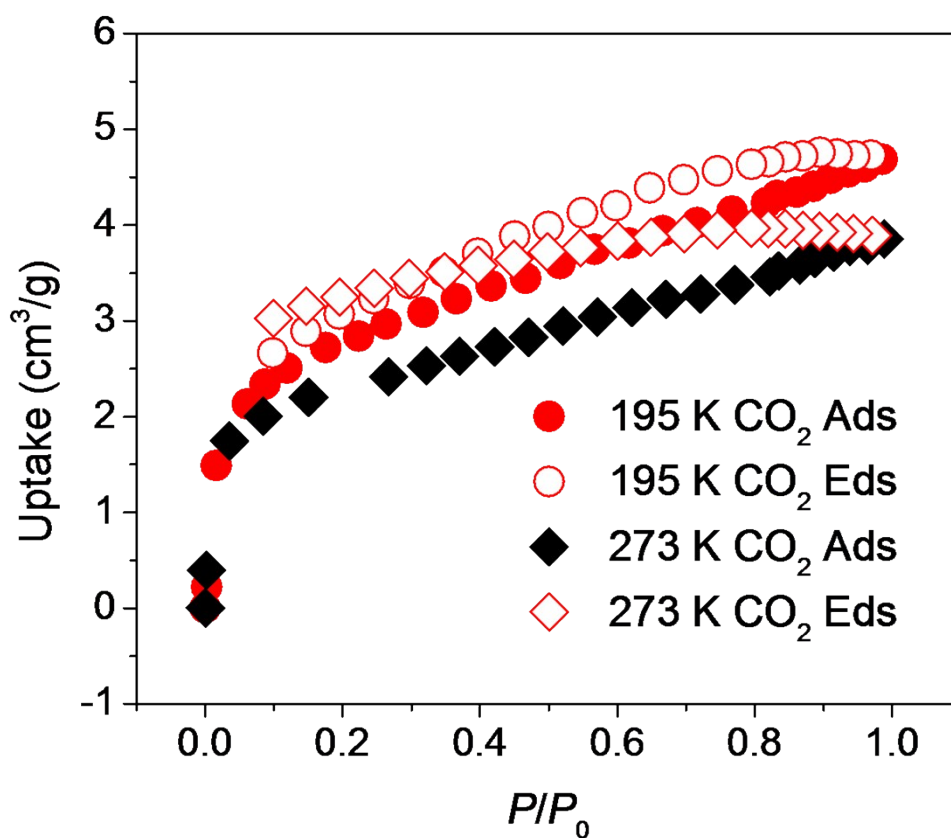

Figure S10. CO<sub>2</sub> adsorption isotherms at 195 K and 273 K for 1. Filled and open symbols represent adsorption and desorption, respectively.

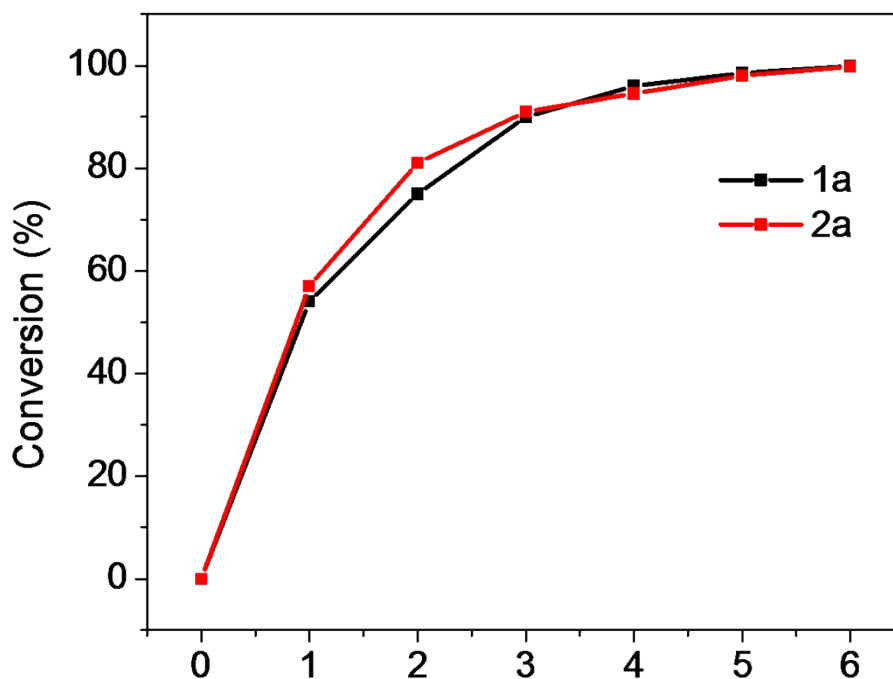

**Figure S11.** Reaction conversion versus reaction time for Knoevenagel condensation reaction of benzaldehyde and malononitrile with **1a** and **2a** as catalyst.

**Table S4.** Knoevenagel condensation reactions of benzaldehyde catalyzed by different catalysts.

| Entry | Catalyst                                                    | Yield (%) |
|-------|-------------------------------------------------------------|-----------|
| 1     | Catalyst-free                                               | 0         |
| 2     | 2-NH <sub>2</sub> -H <sub>2</sub> BDC                       | 1         |
| 3     | Py <sub>2</sub> TTz                                         | 72        |
| 4     | 2-NH <sub>2</sub> -H <sub>2</sub> BDC + Py <sub>2</sub> TTz | 54        |
| 5     | Ph <sub>2</sub> TTz                                         | 48        |
| 6     | <b>1a</b>                                                   | 99.9      |
| 7     | <b>2a</b>                                                   | 99.8      |

**Table S5.** Recyclable experiments of **1a** and **2a** as catalyst for Knoevenagel reaction.

| Entry   | Yield (% <b>1a</b> as catalyst) | Yield (% <b>2a</b> as catalyst) |
|---------|---------------------------------|---------------------------------|
| Round 1 | 99.9                            | 99.8                            |
| Round 2 | 98.5                            | 98.1                            |
| Round 3 | 97.8                            | 98.3                            |
| Round 4 | 97.3                            | 97.6                            |
| Round 5 | 96.7                            | 97.3                            |

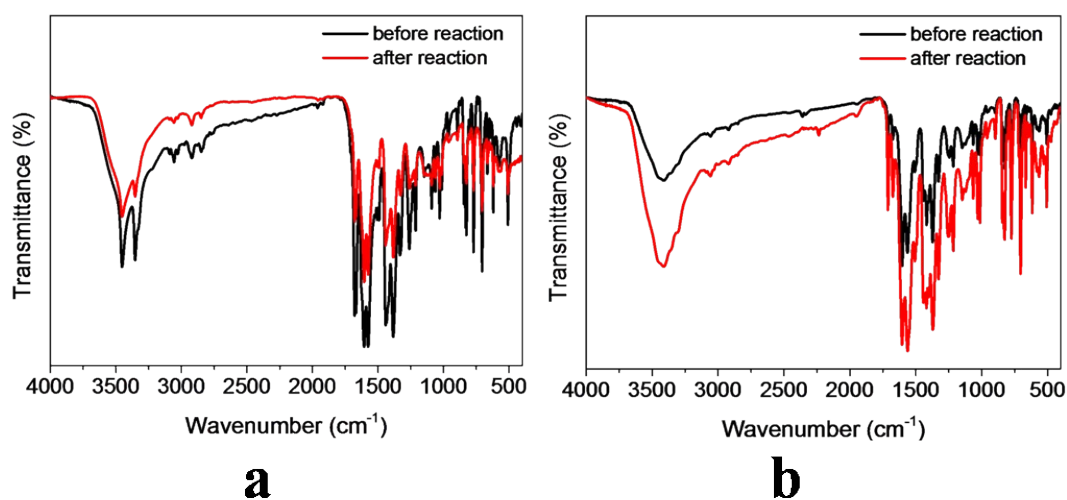

**Figure S12.** (a) IR spectra of **1a** before and after five round catalytic experiments. (b) IR spectra of **2a** before and after five round catalytic experiments.

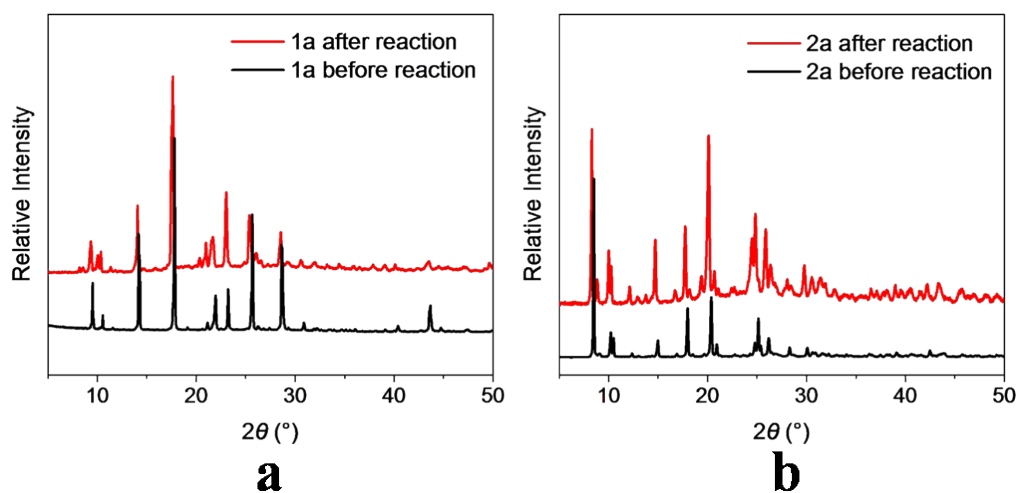

**Figure S13.** (a) PXRD patterns of **1a** before and after five round catalytic experiments. (b) PXRD patterns of **2a** before and after five round catalytic experiments.

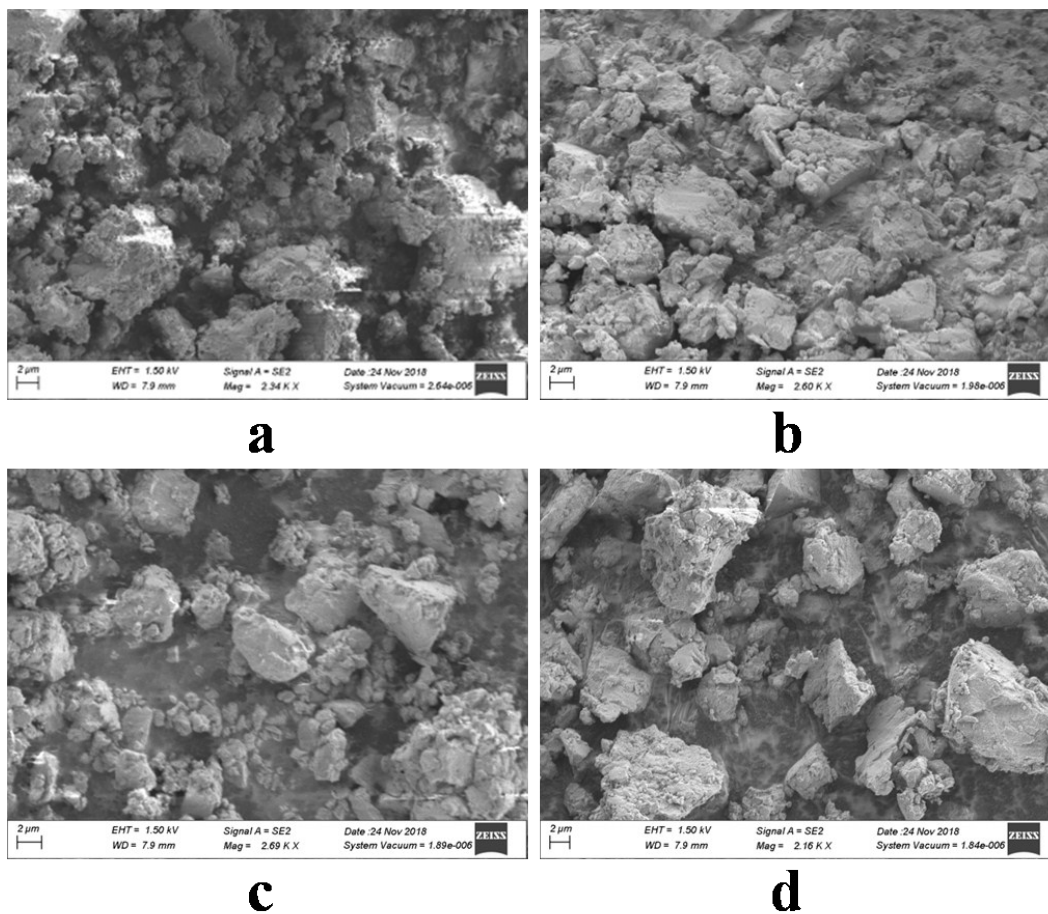

**Figure S14.** (a) SEM images of **1a** before catalytic experiment. (b) SEM images of **1a** after five round catalytic experiments. (c) SEM images of **2a** before catalytic experiment. (d) SEM images of **2a** after five round catalytic experiments.
